# Supplementary material
Source: publisher site journal article supplement (https://www.dovepress.com/article/supplementary_file/531972/Supplementary%20Materials_240725.docx)
Supplement: Supplementary file 1 [file Supplementary%20Materials_240725.docx]

**Supplementary Materials**

**Table of Contents**

**Supplementary Table 1**. Preferred Reporting Items for Systematic Reviews and Meta-Analysis (PRISMA) Checklist

**Supplementary Table 2.** Meta-analysis Of Observational Studies in Epidemiology (MOOSE) Checklist

**Supplementary Table 3.** Search Strategy for the three electronic databases (PubMed, OVID Embase, and OVID Medline) and Inclusion and Exclusion Criteria

**Supplementary Table 4.** Comparator and Reference Groups for Studies included in Analysis

**Supplementary Table 5.** ROBINS-E Risk of Bias (RoB) Assessment

**Supplementary Table 6.** Analysis of Chronic Obstructive Pulmonary Disease (COPD) and Lung Cancer Incidence or Lung Cancer Mortality by Sex

**Supplementary Table 7.** Analysis of Chronic Obstructive Pulmonary Disease (COPD) and Lung Cancer Incidence or Lung Cancer Mortality by Race and Ethnicity

**Supplementary Table 8.** Analysis of Chronic Obstructive Pulmonary Disease (COPD) and Lung Cancer Incidence or Lung Cancer Mortality by Smoking Status

**Supplementary Material A.** Selection of Studies for Sensitivity Analysis

**Supplementary Figure 1.** Assessing Publication Bias Among Studies with Low RoB

**Supplementary Figure 2.** Sensitivity Analysis of Lung Cancer Incidence Risk

**Supplementary Figure 3.** Sensitivity Analysis of Lung Cancer Mortality Risk

**Supplementary Material B.** Reasons for the Exclusion of Articles Retrieved for Full Text Review

**Supplementary Table 1**. Preferred Reporting Items for Systematic Reviews and Meta-Analysis (PRISMA) Checklist

| **Section and Topic** | **Item #** | **Checklist item** | **Location where item is reported** |
| --- | --- | --- | --- |
| **TITLE** | | |  |
| Title | 1 | Identify the report as a systematic review. | Title Page |
| **ABSTRACT** | | |  |
| Abstract | 2 | See the PRISMA 2020 for Abstracts checklist. | 1 |
| **INTRODUCTION** | | |  |
| Rationale | 3 | Describe the rationale for the review in the context of existing knowledge. | 3 |
| Objectives | 4 | Provide an explicit statement of the objective(s) or question(s) the review addresses. | 3 |
| **METHODS** | | |  |
| Eligibility criteria | 5 | Specify the inclusion and exclusion criteria for the review and how studies were grouped for the syntheses. | 4 |
| Information sources | 6 | Specify all databases, registers, websites, organisations, reference lists and other sources searched or consulted to identify studies. Specify the date when each source was last searched or consulted. | 4 |
| Search strategy | 7 | Present the full search strategies for all databases, registers and websites, including any filters and limits used. | eTable3 |
| Selection process | 8 | Specify the methods used to decide whether a study met the inclusion criteria of the review, including how many reviewers screened each record and each report retrieved, whether they worked independently, and if applicable, details of automation tools used in the process. | 4-5 |
| Data collection process | 9 | Specify the methods used to collect data from reports, including how many reviewers collected data from each report, whether they worked independently, any processes for obtaining or confirming data from study investigators, and if applicable, details of automation tools used in the process. | 5-6 |
| Data items | 10a | List and define all outcomes for which data were sought. Specify whether all results that were compatible with each outcome domain in each study were sought (e.g. for all measures, time points, analyses), and if not, the methods used to decide which results to collect. | 5 |
| 10b | List and define all other variables for which data were sought (e.g. participant and intervention characteristics, funding sources). Describe any assumptions made about any missing or unclear information. | 5-6 |
| Study risk of bias assessment | 11 | Specify the methods used to assess risk of bias in the included studies, including details of the tool(s) used, how many reviewers assessed each study and whether they worked independently, and if applicable, details of automation tools used in the process. | 7 |
| Effect measures | 12 | Specify for each outcome the effect measure(s) (e.g. risk ratio, mean difference) used in the synthesis or presentation of results. | 5 |
| Synthesis methods | 13a | Describe the processes used to decide which studies were eligible for each synthesis (e.g. tabulating the study intervention characteristics and comparing against the planned groups for each synthesis (item #5)). | 5-6 |
| 13b | Describe any methods required to prepare the data for presentation or synthesis, such as handling of missing summary statistics, or data conversions. | 5-6 |
| 13c | Describe any methods used to tabulate or visually display results of individual studies and syntheses. | 5-6 |
| 13d | Describe any methods used to synthesize results and provide a rationale for the choice(s). If meta-analysis was performed, describe the model(s), method(s) to identify the presence and extent of statistical heterogeneity, and software package(s) used. | 6 |
| 13e | Describe any methods used to explore possible causes of heterogeneity among study results (e.g. subgroup analysis, meta-regression). | 6 |
| 13f | Describe any sensitivity analyses conducted to assess robustness of the synthesized results. | 7-8 |
| Reporting bias assessment | 14 | Describe any methods used to assess risk of bias due to missing results in a synthesis (arising from reporting biases). | 7 |
| Certainty assessment | 15 | Describe any methods used to assess certainty (or confidence) in the body of evidence for an outcome. | N/A |
| **RESULTS** | | |  |
| Study selection | 16a | Describe the results of the search and selection process, from the number of records identified in the search to the number of studies included in the review, ideally using a flow diagram. | 8 |
| 16b | Cite studies that might appear to meet the inclusion criteria, but which were excluded, and explain why they were excluded. | eTable9 |
| Study characteristics | 17 | Cite each included study and present its characteristics. | 10-13; 15-21 |
| Risk of bias in studies | 18 | Present assessments of risk of bias for each included study. | 13-14; eTable5 |
| Results of individual studies | 19 | For all outcomes, present, for each study: (a) summary statistics for each group (where appropriate) and (b) an effect estimate and its precision (e.g. confidence/credible interval), ideally using structured tables or plots. | 10-15; Table 1 |
| Results of syntheses | 20a | For each synthesis, briefly summarise the characteristics and risk of bias among contributing studies. | 10-15 |
| 20b | Present results of all statistical syntheses conducted. If meta-analysis was done, present for each the summary estimate and its precision (e.g. confidence/credible interval) and measures of statistical heterogeneity. If comparing groups, describe the direction of the effect. | 10-15 |
| 20c | Present results of all investigations of possible causes of heterogeneity among study results. | 10-15 |
| 20d | Present results of all sensitivity analyses conducted to assess the robustness of the synthesized results. | 23-24 |
| Reporting biases | 21 | Present assessments of risk of bias due to missing results (arising from reporting biases) for each synthesis assessed. | N/A |
| Certainty of evidence | 22 | Present assessments of certainty (or confidence) in the body of evidence for each outcome assessed. | N/A |
| **DISCUSSION** | | |  |
| Discussion | 23a | Provide a general interpretation of the results in the context of other evidence. | 24-28 |
| 23b | Discuss any limitations of the evidence included in the review. | 28-29 |
| 23c | Discuss any limitations of the review processes used. | 29 |
| 23d | Discuss implications of the results for practice, policy, and future research. | 29 |
| **OTHER INFORMATION** | | |  |
| Registration and protocol | 24a | Provide registration information for the review, including register name and registration number, or state that the review was not registered. | 3 |
| 24b | Indicate where the review protocol can be accessed, or state that a protocol was not prepared. | 3 |
| 24c | Describe and explain any amendments to information provided at registration or in the protocol. | N/A |
| Support | 25 | Describe sources of financial or non-financial support for the review, and the role of the funders or sponsors in the review. | 30 |
| Competing interests | 26 | Declare any competing interests of review authors. | 30 |
| Availability of data, code and other materials | 27 | Report which of the following are publicly available and where they can be found: template data collection forms; data extracted from included studies; data used for all analyses; analytic code; any other materials used in the review. | 30 |

**Supplementary Table 2.** Meta-analysis Of Observational Studies in Epidemiology (MOOSE) Checklist

| **Item No** | **Recommendation** | **Reported on Page No** |
| --- | --- | --- |
| Reporting of background should include | | |
| 1 | Problem definition | 3 |
| 2 | Hypothesis statement | N/A |
| 3 | Description of study outcome(s) | 5 |
| 4 | Type of exposure or intervention used | 4 |
| 5 | Type of study designs used | 4 |
| 6 | Study population | 4 |
| Reporting of search strategy should include | | |
| 7 | Qualifications of searchers (eg, librarians and investigators) | 4-5 |
| 8 | Search strategy, including time period included in the synthesis and key words | 4; eTable3 |
| 9 | Effort to include all available studies, including contact with authors | N/A |
| 10 | Databases and registries searched | 4 |
| 11 | Search software used, name and version, including special features used (eg, explosion) | 4 |
| 12 | Use of hand searching (eg, reference lists of obtained articles) | N/A |
| 13 | List of citations located and those excluded, including justification | 31-40; eTable9 |
| 14 | Method of addressing articles published in languages other than English | N/A |
| 15 | Method of handling abstracts and unpublished studies | 4 |
| 16 | Description of any contact with authors | N/A |
| Reporting of methods should include | | |
| 17 | Description of relevance or appropriateness of studies assembled for assessing the hypothesis to be tested | 3 |
| 18 | Rationale for the selection and coding of data (eg, sound clinical principles or convenience) | 5-6 |
| 19 | Documentation of how data were classified and coded (eg, multiple raters, blinding and interrater reliability) | 5-6 |
| 20 | Assessment of confounding (eg, comparability of cases and controls in studies where appropriate) | N/A |
| 21 | Assessment of study quality, including blinding of quality assessors, stratification or regression on possible predictors of study results | 7 |
| 22 | Assessment of heterogeneity | 6 |
| 23 | Description of statistical methods (eg, complete description of fixed or random effects models, justification of whether the chosen models account for predictors of study results, dose-response models, or cumulative meta-analysis) in sufficient detail to be replicated | 6 |
| 24 | Provision of appropriate tables and graphics | Table 1; Figures 1-7 |
| Reporting of results should include | | |
| 25 | Graphic summarizing individual study estimates and overall estimate | Figures 2, 3, 6, & 7 |
| 26 | Table giving descriptive information for each study included | Table 1 |
| 27 | Results of sensitivity testing (eg, subgroup analysis) | Figures 4 & 5 |
| 28 | Indication of statistical uncertainty of findings | 10 & 12 |

Adapted from Stroup DF, Berlin JA, Morton SC, et al, for the Meta-analysis Of Observational Studies in Epidemiology (MOOSE) Group. Meta-analysis of Observational Studies in Epidemiology. A Proposal for Reporting. *JAMA*. 2000;283(15):2008-2012. Copyrighted © 2000, American Medical Association. All rights reserved.

**Supplementary Table 3. Search Strategy for the three electronic databases (PubMed, OVID Embase, and OVID Medline) and Inclusion and Exclusion Criteria**

| **Search Strategy** | |
| --- | --- |
| **PubMed**  (((lung neoplasms[MeSH Terms]) AND ((((((smoking[MeSH Terms]) OR (tobacco products[MeSH Terms])) OR (tobacco, smokeless[MeSH Terms])) OR (vaping[MeSH Terms])) OR (electronic nicotine delivery systems[MeSH Terms])) OR (tobacco[MeSH Terms]))) AND ((((incidence[MeSH Terms]) OR (prevalence[MeSH Terms])) OR (risk[MeSH Terms])) OR (risk factors[MeSH Terms]))) AND ((((Pulmonary Disease, Chronic Obstructive[MeSH Terms]) OR pulmonary emphysema[MeSH Terms]) OR emphysema[MeSH Terms]) OR bronchitis, chronic[MeSH Terms]) | **Embase/Medline via OVID**  1 COPD.ab,ti.  2 Chronic obstructive pulmonary disease.ab,ti.  3 Chronic Pulmonary Obstructive Disease.ab,ti.  4 emphysema.ab,ti.  5 Chronic bronchitis.ab,ti.  6 Chronic obstructive airway disease.ab,ti.  7 chronic obstructive lung disease/co, di, dm, ep, et, si [Complication, Diagnosis, Disease Management, Epidemiology, Etiology, Side Effect]  8 exp lung emphysema/ or exp emphysema/ or exp cigarette smoke-induced emphysema/  9 chronic bronchitis  10 exp chronic bronchitis/  11 1 or 2 or 3 or 4 or 5 or 6 or 7 or 8 or 9 or 10  12 risks.ab,ti.  13 incidence.ab,ti.  14 incidence rate.ab,ti.  15 disease progression.ab,ti.  16 prevalence.ab,ti.  17 risk ratio.ab,ti.  18 frequency.ab,ti.  19 epidemiology.ab,ti.  20 exp incidence/ or exp cancer incidence/  21 exp prevalence/  22 exp mortality risk/ or exp attributable risk/ or exp risk factor/ or exp risk/  23 cigarette.ab,ti.  24 smokers.ab,ti.  25 smoking.ab,ti.  26 tobacco.ab,ti.  27 tobacco users.ab,ti.  28 cigars.ab,ti.  29 snus.ab,ti.  30 ENDS.ab,ti.  31 e-cigarettes.ab,ti.  32 "cigar*".ab,ti.  33 cigarillos.ab,ti.  34 exp tobacco smoke/ or exp tobacco/ or exp smokeless tobacco/ or exp tobacco snuff/ or exp chewing tobacco/ or exp tobacco consumption/ or exp waterpipe tobacco/  35 exp smoking/ or exp tobacco consumption/  36 exp electronic cigarette/  37 exp vaping/  38 12 or 13 or 14 or 15 or 16 or 17 or 18 or 19 or 20 or 21 or 22  39 23 or 24 or 25 or 26 or 27 or 28 or 29 or 30 or 31 or 32 or 33 or 34 or 35 or 36 or 37  40 exp lung cancer/  41 exp lung tumor/  42 lung cancer.ab,ti.  43 lung neoplasms.ab,ti.  44 40 or 41 or 42 or 43  45 11 and 38 and 39 and 44 |
| **Inclusion Criteria** | **Exclusion Criteria** |
| - Case control or cohort studies - Reported association between COPD, chronic bronchitis, or emphysema and lung cancer incidence/mortality - PE (OR/HR/IR/IRR) and its 95% CI reported to demonstrate association between COPD and lung cancer incidence/mortality - Sample population is of US descent, with individuals residing in the US at the time of study - Sample is representative of the US population - Data may be adjusted for possible confounding factors and stratified by factors of interest (smoking status, race and ethnicity, and sex) - Peer-reviewed published studies   Articles in English language | - Clinical trial, post-surgical treatment, in-hospital mortality, modelling studies, or economic impact studies - Indirect association between COPD and lung cancer incidence/mortality - PE not reported and cannot be calculated - Data collected from individuals who do not reside in the US - Data collected from non-human species - Study sample is not representative of the US population - Data is not stratified according to sample characteristics (sex, race and ethnicity, and/or smoking status). - Study did not adjust by smoking/tobacco product or tobacco product users - Pre-existing lung disease other than COPD, chronic bronchitis, or emphysema - Only presented results by COPD severity - Not peer-reviewed articles (ex. review papers, abstracts, editorials, conference procedures, or study protocols) - Articles not in English |

Note: COPD=Chronic Obstructive Pulmonary Disease; PE=Point Estimate; OR=Odds Ratio; HR Hazard Ratio; IR=Incidence Ratio; IRR=Incidence Rate Ratio; CI=Confidence Interval

**Supplementary Table 4. Comparator (Reference) Groups for Studies included in Analysis**

| **Study Name** | **Sex** | **Race and Ethnicity** | **Smoking Status** |
| --- | --- | --- | --- |
| **Lung Cancer Incidence** | | | |
| Alavanja et al 199252 |  |  | Lifetime nonsmokers (No previous lung disease); Former smokers (No previous lung disease) |
| Mayne et al 199954 | Male (No emphysema), Female (No emphysema), Male (No chronic bronchitis), Female (No chronic bronchitis) |  | Former smokers (No emphysema), Former smokers (No emphysema), Former smokers (No chronic bronchitis), Former smokers (No chronic bronchitis), Never smokers (No emphysema), Never smokers (No emphysema), Never smokers (No chronic bronchitis), Never smokers (No chronic bronchitis), |
| Littman et al 200442 | Male (No diagnosis of chronic bronchitis or emphysema); Female (No diagnosis of chronic bronchitis or emphysema) |  | Former smokers (No diagnosis of chronic bronchitis or emphysema); Current smokers (No diagnosis of chronic bronchitis or emphysema) |
| Schwartz et al 200959 |  | Non-Hispanic Black (No chronic obstructive lung disease, no emphysema, or no chronic bronchitis); Non-Hispanic white (No chronic obstructive lung disease, no emphysema, or no chronic bronchitis) | Never smokers (No chronic obstructive lung disease or no chronic bronchitis); Former smokers (No chronic obstructive lung disease, no emphysema, or no chronic bronchitis); Current smokers (No chronic obstructive lung disease, no emphysema, or no chronic bronchitis) |
| Zhai et al 201448 | Male (never smokers); Female (never smokers) |  | Former smokers (never smokers); Current smokers (never smokers) |
| Schwartz et al 201661 |  | Non-Hispanic Black (No emphysema or no COPD), Non-Hispanic white (No emphysema or no COPD) |  |
| Hopkins et al 201750 |  |  | Current smokers |
| Gardner et al 201845 | Male (No COPD), Female (No COPD) | Black (No COPD), White (No COPD) |  |
| Nagasaka et al 202046 |  | Black (white), Other (white) |  |
| **Lung Cancer Mortality** | | | |
| Turner et al 200757 | Male (No chronic bronchitis, no emphysema, or no chronic bronchitis and emphysema), Female (No chronic bronchitis, no emphysema, or no chronic bronchitis and emphysema) |  |  |
| Aldrich et al 201544 | Male (Female) | Non-Hispanic white (Non-Hispanic Black) | Former smokers and current smokers (never smokers) |

Note: The referent group is placed in parentheses; The study by Zhai et al wasn’t presented in overall analyses because it did not provide an overall point estimate, it only presented estimates by smoking status and the result for sex is a combination of sex and smoking status

**Supplementary Table 5. ROBINS-E Risk of Bias (RoB) Assessment**

Scoring and color scheme: 1 (green)=Low RoB; 2 (green)=Low RoB except concerns about residual confounding; 3=Some concerns (yellow); 4=High RoB (red); 5=Very high RoB (red); NA= Not Applicable (gray)

| **RoB Domains** | **Sub-domain (if applicable)** | Alavanja et al (1992) 52 | Wu et al (1995)53 | Mayne et al (1999)54 | Brownson and Alavanja, (2000)55 | Osann et al (2000)56 | Littman et al (2004)42 | Turner et al (2007)57 | Wilson et al (2008)58 | Schwartz et al (2009)59 | Li et al (2011)49 | Mina et al(2012)60 | McHugh et al (2013)43 | Zhai et al (2014)48 | Aldrich et al (2015)44 | Schwartz et al (2016) 61 | Hopkins et al (2017)50 | Gardner et al (2018)45 | Nagasaka et al(2020)46 | Charokopos et al (2021)513/21/23 10:39:00 PM | Singh et al (2022)47 |
| --- | --- | --- | --- | --- | --- | --- | --- | --- | --- | --- | --- | --- | --- | --- | --- | --- | --- | --- | --- | --- | --- |
| **1: RoB Confounding** | **Pre-exposure** | **1** | **3** | **3** | **1** | **1** | **3** | **1** | **1** | **1** | **1** | **1** | **1** | **1** | **1** | **1** | **3** | **3** | **3** | **1** | **3** |
| **Post-exposure** | **3** | **3** | **3** | **1** | **1** | **3** | **1** | **1** | **1** | **1** | **1** | **1** | **1** | **1** | **1** | **3** | **3** | **3** | **1** | **3** |
| **2: RoB measurement of exposure** | **Self-Reports** | **1** | **3** | **3** | **3** | **1** | **3** | **3** | **1** | **3** | **NA** | **NA** | **1** | **3** | **1** | **1** | **NA** | **3** | **3** | **NA** | **NA** |
| **CB/E clinical diagnosis** | **NA** | **NA** | **NA** | **NA** | **NA** | **NA** | **NA** | **NA** | **NA** | **NA** | **1** | **NA** | **NA** | **NA** | **1** | **1** | **NA** | **NA** | **1** | **NA** |
| **Medical Records** | **NA** | **NA** | **NA** | **NA** | **NA** | **NA** | **NA** | **1** | **NA** | **1** | **1** | **NA** | **NA** | **1** | **NA** | **NA** | **NA** | **NA** | **NA** | **1** |
| **3: RoB Selection of Participants** | **NA** | **1** | **1** | **1** | **1** | **1** | **1** | **1** | **NA** | **3** | **1** | **1** | **1** | **1** | **1** | **1** | **1** | **1** | **1** | **1** | **1** |
| **4: RoB post-exposure interventions** | **NA** | **1** | **1** | **1** | **1** | **1** | **1** | **1** | **1** | **1** | **1** | **1** | **1** | **1** | **1** | **1** | **1** | **1** | **1** | **1** | **1** |
| **5: RoB missing data** | **NA** | **1** | **3** | **1** | **1** | **1** | **1** | **1** | **1** | **1** | **1** | **1** | **1** | **1** | **1** | **1** | **1** | **1** | **3** | **1** | **1** |
| **6: RoB measurement of outcome** | **NA** | **1** | **1** | **1** | **1** | **1** | **1** | **1** | **1** | **1** | **1** | **1** | **1** | **1** | **1** | **1** | **1** | **1** | **1** | **1** | **1** |
| **7: RoB selection of reported results** | **NA** | **1** | **1** | **1** | **1** | **1** | **1** | **1** | **1** | **1** | **1** | **1** | **1** | **1** | **1** | **1** | **1** | **1** | **1** | **1** | **1** |
| **Overall RoB** | **NA** | **2** | **3** | **3** | **3** | **1** | **3** | **3** | **1** | **3** | **1** | **1** | **1** | **2** | **1** | **1** | **2** | **3** | **3** | **1** | **2** |
| **Is RoB sufficiently high to threaten conclusions about whether exposure has an important effect on outcome?** | | **No** | **No** | **No** | **No** | **No** | **No** | **No** | **No** | **No** | **No** | **No** | **No** | **No** | **No** | **No** | **Can’t Tell** | **No** | **No** | **No** | **No** |

*Definition of abbreviations: CB=Chronic Bronchitis; E=Emphysema; NA=Not Applicable*

Note: CB/E clinical diagnosis included spirometry and/or chest CT

**Supplementary Table 6. Analysis of Chronic Obstructive Pulmonary Disease (COPD) and Lung Cancer Incidence or Mortality by Sex**

| **Author, Publication Year** | **Sex** | **Study Design** | **COPD Diagnosis (Assessment Method)** | **Outcome** | **Point Estimate (95% CI)** | **Referent Group** |
| --- | --- | --- | --- | --- | --- | --- |
| Aldrich et al 201544 | Male | Prospective Cohort (median follow-up of over 6 years) | Chronic bronchitis or Emphysema (Medical records) | Mortality | HR=1.26 (0.87 to 1.82) | Female |
| Mayne et al 199954 | Male | Case-control | Emphysema (Self-reported) | Incidence | OR=1.53 (0.80 to 2.94) | No emphysema |
| Chronic bronchitis (Self-reported) | Incidence | OR=2.08 (1.05 to 4.15) | No chronic bronchitis |
| Mayne et al 199954 | Female | Case-control | Emphysema (Self-reported) | Incidence | OR=4.00 (1.13 to 14.18) | No emphysema |
| Chronic bronchitis (Self-reported) | Incidence | OR=1.50 (0.83 to 2.72) | No chronic bronchitis |
| Gardner et al 201845 | Male | Case-control | COPD (Self-reported) | Incidence | OR=2.28 (1.67 to 3.10) | No COPD |
| Gardner et al 201845 | Female | Case-control | COPD (Self-reported) | Incidence | OR=2.10(1.54 to 2.86) | No COPD |
| Littman et al 200442 | Male | Prospective cohort (median follow-up of 9.1 years with a maximum of 16 years) | Chronic bronchitis or emphysema; grouped (Self-reported) | Incidence | HR=1.52 (1.19 to 1.94) | No diagnosis of chronic bronchitis or emphysema |
| Littman et al 200442 | Female | Prospective cohort (median follow-up of 9.1 years with a maximum of 16 years) | Chronic bronchitis or emphysema; grouped (Self-reported) | Incidence | HR=1.14 (0.85 to 1.52) | No diagnosis of chronic bronchitis or emphysema |
| Turner et al 200757 | Male | Prospective cohort (20-year follow-up period) | Chronic bronchitis (self-reported) | Mortality | HR= 1.59 (0.95 to 2.66) | No chronic bronchitis |
| Emphysema (self-reported) | Mortality | HR=1.42 (0.70 to 2.88) | No emphysema |
| Chronic Bronchitis and Emphysema (self-reported) | Mortality | HR=3.60 (1.34 to 9.73) | No chronic bronchitis and emphysema |
| Turner et al 200757 | Female | Prospective cohort (20-year follow-up period) | Chronic bronchitis (self-reported) | Mortality | HR=0.82 (0.58 to 1.16) | No chronic bronchitis |
| Emphysema (self-reported) | Mortality | HR=1.82 (1.03 to 3.21) | No emphysema |
| Chronic Bronchitis and Emphysema (self-reported) | Mortality | HR= 1.82 (0.68 to 4.87) | No chronic bronchitis and emphysema |

*Definition of abbreviations: CI=confidence interval; HR=hazard ratio; OR=odds ratio*

**Supplementary Table 7. Analysis of Chronic Obstructive Pulmonary Disease (COPD) and Lung Cancer Incidence or Mortality by Race and Ethnicity**

| **Author, Publication Year** | **Race and Ethnicity** | **Study Design** | **COPD Diagnosis (Assessment Method)** | **Outcome** | **Point Estimate (95% CI)** | **Referent Group** |
| --- | --- | --- | --- | --- | --- | --- |
| Aldrich et al 201544 | Non-Hispanic White | Prospective Cohort (median follow-up of over 6 years) | Chronic bronchitis or Emphysema (Medical records) | Mortality | HR=1.17 (0.81 to 1.69) | Non-Hispanic Black |
| Schwartz et al 200959 | Non-Hispanic White | Case-control | Chronic Obstructive Lung Disease; includes chronic bronchitis, emphysema, or COPD (self-reported) | Incidence | OR= 1.85 (1.21 to 2.81) | No chronic obstructive lung disease |
| Emphysema (Self-reported) | Incidence | OR= 3.75 (1.69 to 8.32) | No emphysema |
| Chronic bronchitis (Self-reported) | Incidence | OR= 1.82 (1.13 to 2.92) | No chronic bronchitis |
| Schwartz et al 200959 | Non-Hispanic Black | Case-control | Chronic Obstructive Lung Disease; includes chronic bronchitis, emphysema, or COPD (self-reported) | Incidence | OR= 1.11 (0.49 to 2.49) | No chronic obstructive lung disease |
| Emphysema (Self-reported) | Incidence | OR= 1.86 (0.42 to 8.23) | No emphysema |
| Chronic bronchitis (Self-reported) | Incidence | OR= 1.38 (0.56 to 3.37) | No chronic bronchitis |
| Schwartz et al 201661 | Non-Hispanic White | Case-control | Emphysema (Self-reported) | Incidence | OR= 1.84 (1.13 to 3.02) | No emphysema |
| Emphysema (CT) | Incidence | OR= 1.42 (0.95 to 2.12) | No emphysema |
| COPD (Self-reported) | Incidence | OR= 1.18 (0.78 to 1.77) | No COPD |
| COPD (Spirometry) | Incidence | OR= 1.96 1.34 to 2.88) | No COPD |
| Schwartz et al 201661 | Non-Hispanic Black | Case-control | Emphysema (Self-reported) | Incidence | OR= 2.24 (1.11 to 4.53) | No emphysema |
| Emphysema (CT) | Incidence | OR= 2.40 (1.55 to 3.72 | No emphysema |
| COPD (Self-reported) | Incidence | OR= 2.04 (1.27 to 3.28) | No COPD |
| COPD (Spirometry) | Incidence | OR=1.97 (1.31 to 2.95) | No COPD |
| Gardner et al 201845 | Black | Case-control | COPD (Self-reported) | Incidence | OR=2.83 (1.92 to 4.16) | No COPD |
| Gardner et al 201845 | White | Case-control | COPD (Self-reported) | Incidence | OR=2.04 (1.57 to 2.67) | No COPD |
| Nagasaka et al 202046 | Black | Prospective cohort (follow up through December 31, 2015) | COPD (Self-reported) | Incidence | HR=1.22 (0.97 to 1.52) | White |
| Nagasaka et al 202046 | Other | Prospective cohort (follow up through December 31, 2015) | COPD (Self-reported) | Incidence | HR=0.97 (0.74 to 1.26) | White |

*Definition of abbreviations: CI=confidence interval; OR=odds ratio; and HR=hazard ratio*

**Supplementary Table 8. Analysis of Chronic Obstructive Pulmonary Disease (COPD) and Lung Cancer Incidence or Lung Cancer Mortality by Smoking Status**

| **Author, Publication Year** | **Smoking Status** | **Study Design** | **COPD Diagnosis (Assessment Method)** | **Outcome** | **Point Estimate (95% CI)** | **Referent Group** |
| --- | --- | --- | --- | --- | --- | --- |
| Alavanja et al 199252 | Never smokers**a** | Case-control | Chronic bronchitis (Self-reported) | Incidence | OR=1.4 (0.7 to 2.5)b | No previous lung disease |
| Emphysema (Self-reported) | Incidence | OR=0.7 (0.1 to 5.5)b | No previous lung disease |
| Mayne et al 199954 | Never smokers**c** | Case-control | Emphysema (Self-reported) | Incidence | OR=3.01 (0.61 to 14.86) | No emphysema |
| Chronic bronchitis (Self-reported) | Incidence | OR=1.57 (0.80 to 3.07) | No chronic bronchitis |
| Schwartz et al 200959 | Never smokers | Case-control | Chronic Obstructive Lung Disease; includes chronic bronchitis, emphysema, or COPD (Self-reported) | Incidence | OR= 0.34 (0.08 to 1.51) | No chronic obstructive lung disease |
| Chronic bronchitis (Self-reported) | Incidence | OR= 0.37 (0.08 to 1.65) | No chronic bronchitis |
| Alavanja et al 199252 | Former smokers**d** | Case-control | Chronic bronchitis (Self-reported) | Incidence | OR=1.0 (0.5 to 2.3)b | No previous lung disease |
| Emphysema (Self-reported) | Incidence | OR=2.3 (0.7 to 7.3)b | No previous lung disease |
| Mayne et al 199954 | Former smokerse | Case-control | Emphysema (Self-reported) | Incidence | OR=1.81 (0.98 to 3.34) | No emphysema |
| Chronic bronchitis (Self-reported) | Incidence | OR=1.88 (1.02 to 3.44) | No chronic bronchitis |
| Aldrich et al 201544 | Former smokers | Prospective Cohort (median follow-up of over 6 years) | Chronic bronchitis or Emphysema (Medical records) | Mortality | HR=4.67 (1.66 to 13.17) | Never smokers |
| Littman et al 200442 | Former smokersf | Prospective cohort (median follow up of 9.1 years with a maximum of 16 years) | Chronic bronchitis or emphysema; grouped (Self-reported) | Incidence | HR=1.43 (0.99 to 2.07) | No diagnosis of chronic bronchitis or emphysema |
| Schwartz et al 200959 | Former smokersg | Case-control | Chronic Obstructive Lung Disease; includes chronic bronchitis, emphysema, or COPD (Self-reported) | Incidence | OR= 2.03 (1.11 to 3.71) | No chronic obstructive lung disease |
| Emphysema (Self-reported) | Incidence | OR= 5.33 (1.65 to 17.20) | No emphysema |
| Chronic bronchitis (Self-reported) | Incidence | OR= 1.51 (0.76 to 3.02) | No chronic bronchitis |
| Zhai et al 201448 | Former smokersh | Case-control | Chronic bronchitis, emphysema, and/or COPD (Self-reported) | Incidence | OR=4.69 (3.22 to 6.81)i | Never smokersj |
| Zhai et al 201448 | Female Former Smokersh | Case-controlk | COPD (Self-reported) | Incidence | OR=5.06 (3.14 to 8.15) | Female never smokersj in the NSCLC-COPD vs. NSCLC-NO-COPD cohort |
| Zhai et al 201448 | Male Former Smokersh | Case-controlk | COPD (Self-reported) | Incidence | OR=3.95 (2.16 to 7.24) | Male never smokersj in the NSCLC-COPD vs. NSCLC-NO-COPD cohort |
| Littman et al 200442 | Current smokers | Prospective cohort (median follow up of 9.1 years with a maximum of 16 years) | Chronic bronchitis or emphysema; grouped (Self-reported) | Incidence | HR= 1.25 (1.04 to 1.51) | No diagnosis of chronic bronchitis or emphysema |
| Schwartz et al 200959 | Current smokers | Case-control | Chronic Obstructive Lung Disease; includes chronic bronchitis, emphysema, or COPD (Self-reported) | Incidence | OR= 1.93 (1.06 to 3.49) | No chronic obstructive lung disease |
| Emphysema (Self-reported) | Incidence | OR=2.33 (0.91 to 5.97) | No emphysema |
| Chronic bronchitis (Self-reported) | Incidence | OR= 3.08 (1.47 to 6.43) | No chronic bronchitis |
| Zhai et al 201448 | Current smokersl | Case-control | Chronic bronchitis, emphysema, and/or COPD (Self-reported) | Incidence | OR=7.92 (5.43 to 11.57)i | Never smokersj |
| Zhai et al 201448 | Female Current Smokersl | Case-controlk | COPD (Self-reported) | Incidence | OR=8.95 (5.55 to 14.47) | Female never smokersj in the NSCLC-COPD vs. NSCLC-NO-COPD cohort |
| Zhai et al 201448 | Male Current Smokersl | Case-controlk | COPD (Self-reported) | Incidence | OR=6.43 (3.47 to 11.89) | Male never smokersj in the NSCLC-COPD vs. NSCLC-NO-COPD cohort |
| Hopkins et al 201650 | Ever smokersm,n | Prospective cohort (mean follow-up, 6.4 years) | No airflow limitation (Spirometry) | Incidence | IR=3.04 (2.65 to 3.48) | Heavy smokers with airflow limitation |

*Definition of abbreviations: CI=confidence interval; OR=odds ratio; HR=hazard ratio; IR=Incidence Ratio; NRGP= No referent group provided*

a Lifetime nonsmokers: women who had never smoked more than 100 cigarettes or used any other tobacco product for more than 6 months in their lifetime

b Only determined for participants who were interviewed directly (n=1618) and excluded cases for whom only a proxy interview (n=402) was available

c Never smoked more than 100 cigarettes

d Former smokers: women who had ceased using all tobacco products 15 or more years before study interview

e Smoked at some time but not more than 100 cigarettes in the 10 years prior to diagnosis

f Former smokers: quit within six years prior to the study

g Former smokers: quit at least 2 years before lung cancer diagnosis (cases)

h Quit smoking for more than 12 months

i Non-small cell lung cancer (NSCLC)-COPD vs. NSCLC-NO-COPD

j Smoked fewer than 100 cigarettes in their lifetime

k Although the overall study was a case-control study, the extracted results were specifically among a cohort of participants with non-small cell lung cancer and COPD (NSCLC-COPD) and participants with non-small cell lung cancer but without COPD (NSCLC-NO-COPD)

l Currently smoking (at the time of study) or had quit during the 12 months prior to study

m Current and former smokers with no airflow limitation

n Subgroup is specifically “healthy smokers”

**Supplementary Material A**

**Selection of Studies for Sensitivity Analysis**

From the Aldrich et al study44, observations were chosen for self-reported COPD as opposed to medical records because some data from medical records were combined with self-reported data. Brownson et al55, Alavanja et al52, Osann et al56, and Wu et al53 studies, self-reported diagnosis of emphysema was chosen over that of chronic bronchitis as previous studies indicate that there is greater discordance between self-reported chronic bronchitis and clinical diagnoses when compared to emphysema.40 For Schwartz et al 200959 and 201661, and Turner et al57, self-reported COPD was used as it was an inclusive definition of chronic bronchitis, emphysema, and/or COPD. This was done because studies indicate that these diseases often coexist and there may be less misclassification among participants reporting more than one condition.40 For the Mina et al60, clinical history of COPD was chosen as it encompassed previous physician diagnosis of COPD, chronic bronchitis, or emphysema and whether the patient reported COPD to the clinician. Similarly, the observation using COPD was chosen for the Wilson et al58 since it was assessed using airflow obstruction of GOLD stages I-IV. Additionally, the Mayne et al54, Wilson et al58, and Wu et al53 studies provided multiple observations with models containing different adjustments. Of these studies, fully adjusted models were selected to ensure there were no limitations in the selected data.41

**Supplementary Figure 1.** Assessing Publication Bias Among Studies with Low RoB


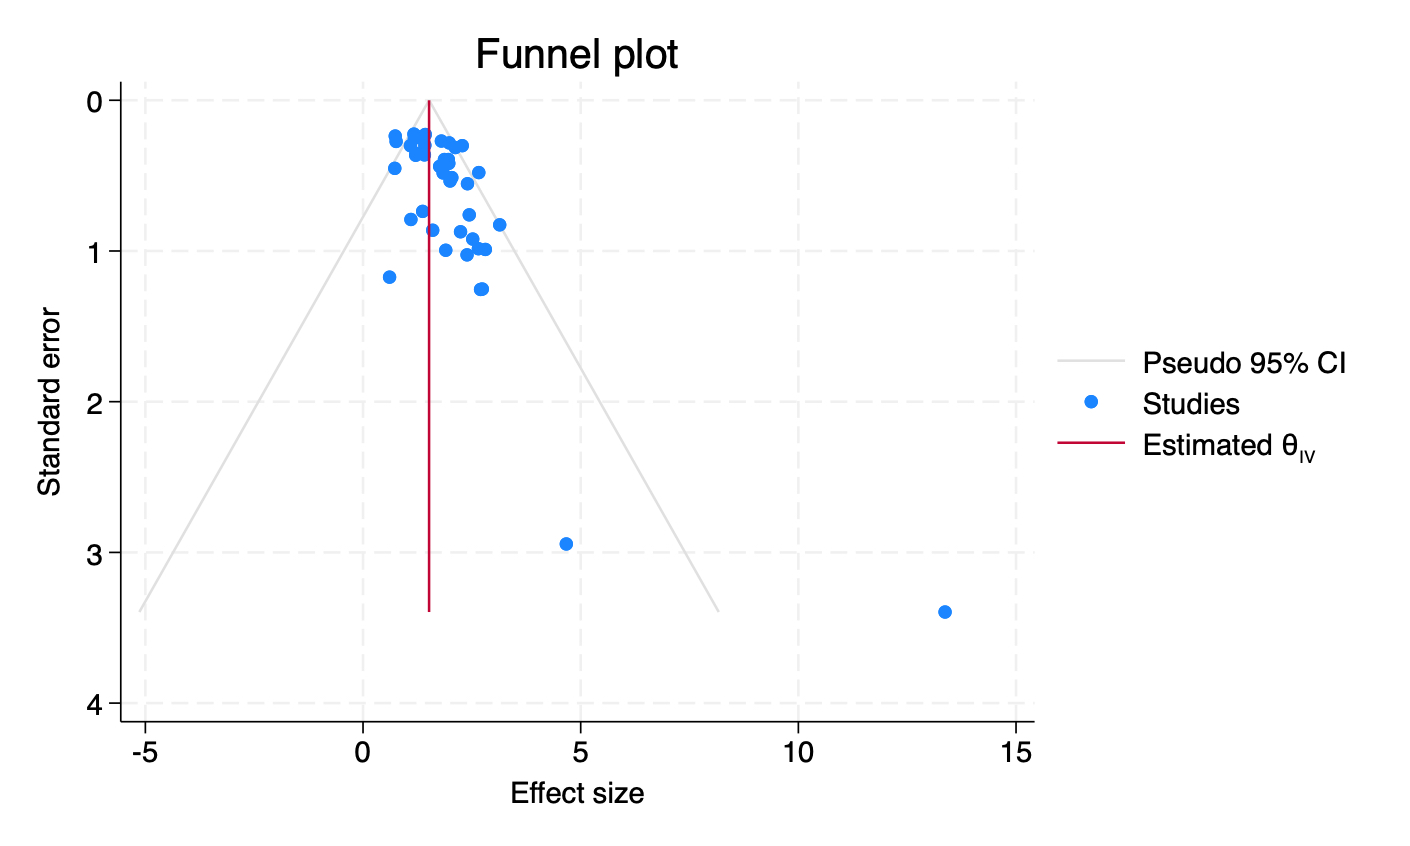


**Supplementary** **Figure 2.** Sensitivity Analysis of Lung Cancer Incidence Risk


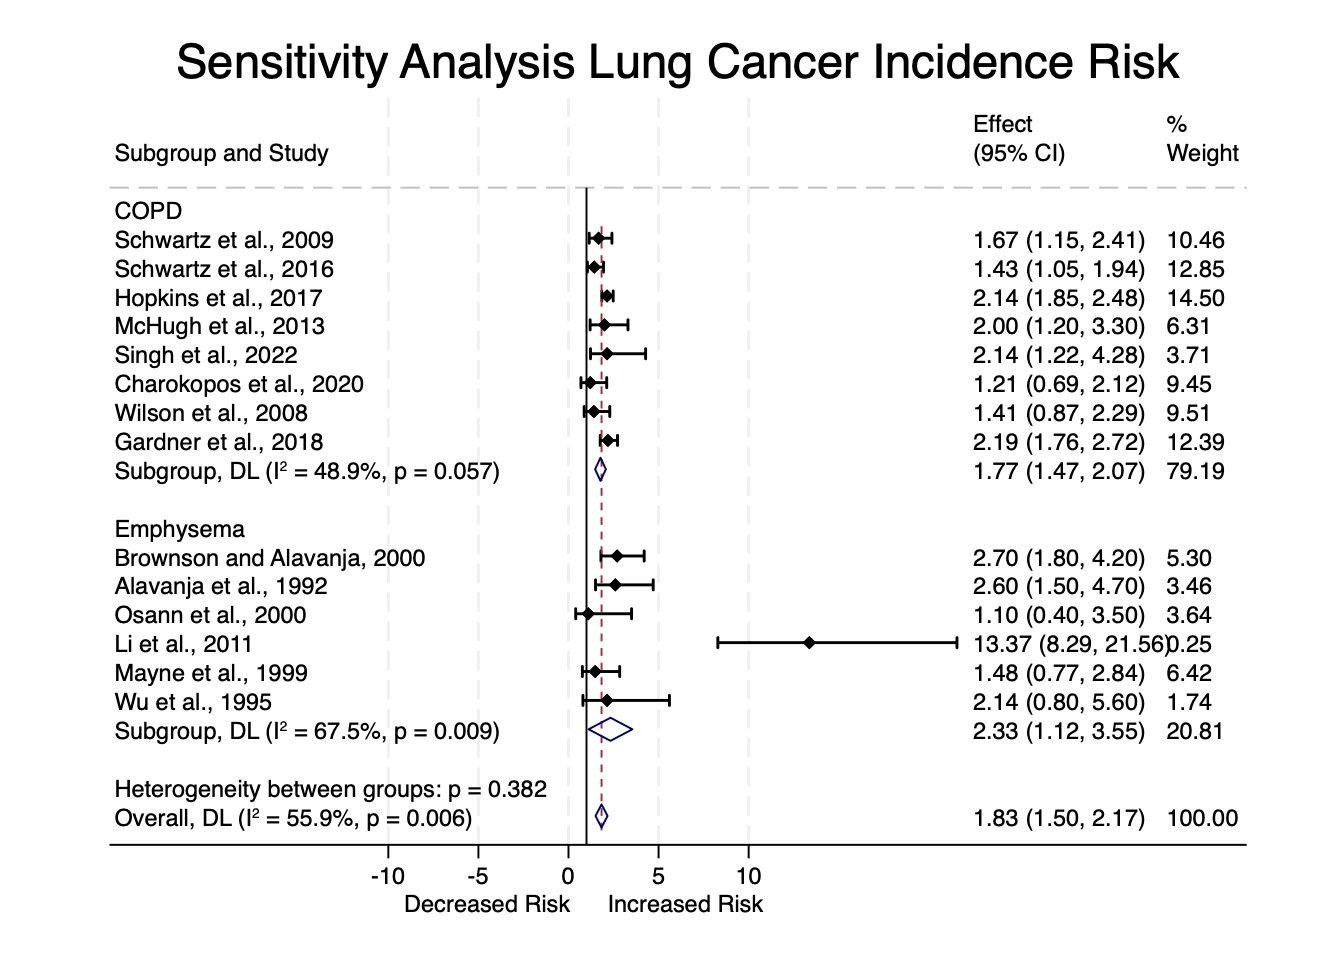


**Supplementary Figure 3.** Sensitivity Analysis of Lung Cancer Mortality Risk

**
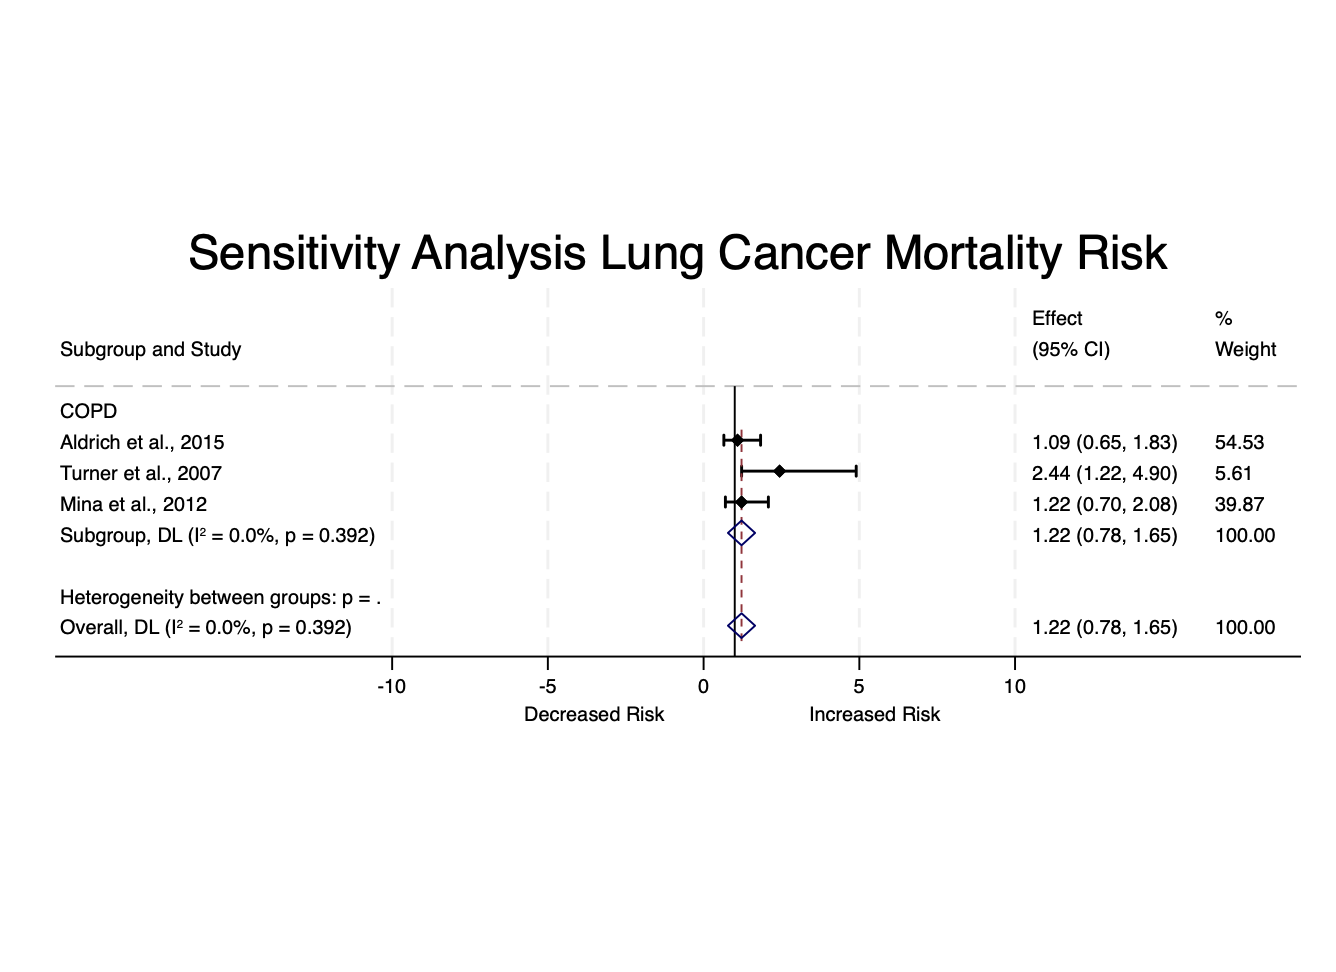
**

**Supplementary Material B. Reasons for the Exclusion of Articles Retrieved for Full Text Review**

| **Author-Year** | **Title** | **Exclusion Reason** |
| --- | --- | --- |
| Abukhalaf et al 20181 | Chronic obstructive pulmonary disease mortality, a competing risk analysis | Not specific for lung cancer |
| Adie et al 20192 | Neighborhood disadvantage and lung cancer incidence in an electronic health record cohort | Wrong publication type: Conference procedure |
| Brenner et al 20113 | Previous lung diseases and lung cancer risk: a systematic review and meta-analysis | Wrong publication type: Review |
| Brenner et al 20124 | Previous lung diseases and lung cancer risk: a pooled analysis from the International Lung Cancer Consortium | Wrong publication type: Meta-analysis |
| Brigham et al 20205 | Health Disparities in Environmental and Occupational Lung Disease | Wrong publication type: Review |
| Carr et al 20186 | Features of COPD as Predictors of Lung Cancer | COPD outcomes only presented by severity grade |
| Chao et al 20087 | Alcoholic beverage intake and risk of lung cancer: the California Men's Health Study | Doesn’t look at the relationship between COPD and lung cancer incidence/mortality |
| Charokopos et al 20207 | Lung Cancer Risk in Women Versus Men Varies According to Level of Tobacco Exposure | Wrong publication type: Conference Paper |
| Christensen et al 20188 | Association of Cigarette, Cigar, and Pipe Use With Mortality Risk in the US Population | Doesn’t look at the relationship between COPD and lung cancer incidence/mortality |
| Cote et al 20159 | COPD and risk of lung cancer in post-menopausal women: Findings from the Women's Health Initiative | Wrong publication type: Abstract |
| Davis, 197610 | Bronchogenic carcinoma in chronic obstructive pulmonary disease | Only prevalence/descriptive statistics provided |
| De Torres et al 200711 | Assessing the relationship between lung cancer risk and emphysema detected on low-dose CT of the chest | Population not exclusive to the United States |
| De Torres et al 201112 | Lung Cancer in Patients with Chronic Obstructive Pulmonary Disease: Incidence and Predicting Factors | Population not exclusive to the United States |
| Divo et al 201213 | Comorbidities, gender and mortality differences in patients with COPD | Wrong publication type: Abstract |
| Dorn, 195914 | Tobacco consumption and mortality from cancer and other diseases | Wrong publication type: Public Health Report |
| Henderson et al 201815 | Lung cancer risk and characteristics of adults undergoing LDCT lung cancer screening | Wrong publication type: Abstract |
| Henley et al 200416 | Association between exclusive pipe smoking and mortality from cancer and other diseases | Doesn’t look at the relationship between COPD and lung cancer incidence/mortality |
| Henley et al 200717 | Tobacco-related disease mortality among men who switched from cigarettes to spit tobacco | Doesn’t look at the relationship between COPD and lung cancer incidence/mortality |
| Huang et al 201518 | Associated Links Among Smoking, Chronic Obstructive Pulmonary Disease, and Small Cell Lung Cancer: A Pooled Analysis in the International Lung Cancer Consortium | Population not exclusive to the United States |
| Hung, 201919 | MS12.04 The International Lung Cancer Consortium (ILCCO), an International Study to Identify Risk Factors for Lung Cancer Development | Wrong publication type: Abstract |
| Islam et al 199420 | Declining FEV1 and chronic productive cough in cigarette smokers: a 25-year prospective study of lung cancer incidence in Tecumseh, Michigan | Wrong publication type: Abstract |
| Kahn, 196621 | Epidemiological approaches to the study of cancer and other chronic diseases. The Dorn study of smoking and mortality among U.S. Veterans: Report on eight and one-half years of observation | Wrong publication type: Book chapter |
| Kinsey et al 201222 | Association of lung adenocarcinoma and radiographic emphysema | Wrong publication type: Abstract |
| Labaki et al 201923 | Causes and Predictors of Death in Smokers with and Without COPD: An Analysis of the COPDGene Cohort | Wrong publication type: Abstract |
| Lewis et al 200924 | Lung Disease Mortality in the United States: The National Longitudinal Mortality Study | Doesn’t look at the relationship between COPD and lung cancer incidence/mortality |
| Loganathan et al 200625 | Prevalence of COPD in women compared to men around the time of diagnosis of primary lung cancer | Only prevalence/descriptive statistics provided |
| Mukherjee et al 201526 | Significance of Emphysema in a Lung Cancer Screening Cohort | Wrong publication type: Conference procedure |
| Ostridge et al 201527 | Incidental Lung Cancer and Pulmonary Nodules Identified by Research CT in a Population with Moderate to Very Severe COPD | Wrong publication type: Conference procedure |
| Patel et al 202228 | Impact of chronic obstructive pulmonary disease, lung infection, and/or inhaled corticosteroids use on potential risk of lung cancer | Wrong publication type: Review |
| Regan et al 201329 | Longitudinal data collection identifies incidence of new patient-reported comorbidities in smokers with and without COPD | Wrong publication type: Abstract |
| Safi et al 201330 | Demographic Characteristics of Subjects Recruited For Lung Cancer And COPD Risk Test Validation | Wrong publication type: Abstract |
| Salcedo et al 201231 | Emphysema, COPD and lung cancer screening. Update of an ongoing study | Wrong publication type: Abstract |
| Samet et al 198032 | Respiratory disease mortality in New Mexico's American Indians and Hispanics | Doesn’t look at the relationship between COPD and lung cancer incidence/mortality |
| Semenzato et al 202133 | Low-Blood Lymphocyte Number and Lymphocyte Decline as Key Factors in COPD Outcomes: A Longitudinal Cohort Study | Population not exclusive to the United States |
| Singh et al 202034 | Reappraisal of Risk Factors for Lung-rads 4 in a Racially Diverse Screening Cohort | Wrong publication type: Abstract |
| Skillrud et al 198635 | Higher risk of lung cancer in chronic obstructive pulmonary disease. A prospective, matched, controlled study | Wrong statistic: only presents descriptive statistics |
| Thun et al 201336 | 50-year trends in smoking-related mortality in the United States | Doesn’t look at the relationship between COPD and lung cancer incidence/mortality |
| Tofolean et al 201137 | COPD prevalence in lung cancer patients-Is COPD a risk factor for lung cancer? | Wrong publication type: Conference procedure |
| Virdi et al 201538 | Passive Smoke Exposure is not a Significant Risk Factor in the Development of Lung Cancer | Wrong publication type: Abstract |

Note: COPD=Chronic Obstructive Pulmonary Disease; PE=Point Estimate; CI=Confidence Interval

**Supplementary Material B References**

1. Abukhalaf J, Davidson R, Villalobos N, Meek P, Petersen H, Sood A, Tesfaigzi Y, Vazquez Guillamet R: Chronic obstructive pulmonary disease mortality, a competing risk anal ysis. *The Clinical Respiratory Journal* 2018, 12(11):2598-2605.

2. Adie Y, Tlimat A, Kats D, Perzynski A, Tarabichi Y: Neighborhood Disadvantage and Lung Cancer Incidence in an Electronic H ealth Record Cohort. In*: 2019/5//*: American Thoracic Society: A7287-A7287.

3. Brenner DR, McLaughlin JR, Hung RJ: Previous Lung Diseases and Lung Cancer Risk: A Systematic Review and M eta-Analysis. *PLoS ONE* 2011, 6(3):e17479.

4. Brenner DR, Boffetta P, Duell EJ, Bickeboller H, Rosenberger A, McCormack V, Muscat JE, Yang P, Wichmann HE, Brueske-Hohlfeld I *et al*: Previous Lung Diseases and Lung Cancer Risk: A Pooled Analysis From th e International Lung Cancer Consortium. *American Journal of Epidemiology* 2012, 176(7):573-585.

5. Brigham E, Allbright K, Harris D: Health Disparities in Environmental and Occupational Lung Disease. *Clinics in Chest Medicine* 2020, 41(4):623-639.

6. Carr LL, Jacobson S, Lynch DA, Foreman MG, Flenaugh EL, Hersh CP, Sciurba FC, Wilson DO, Sieren JC, Mulhall P *et al*: Features of COPD as Predictors of Lung Cancer. *Chest* 2018, 153(6):1326-1335.

7. Chao C, Slezak JM, Caan BJ, Quinn VP: Alcoholic beverage intake and risk of lung cancer: the California Men' s Health Study. *Cancer Epidemiology, Biomarkers & Prevention: A Publication of the Ame rican Association for Cancer Research, Cosponsored by the American Soc iety of Preventive Oncology* 2008, 17(10):2692-2699.

8. Christensen CH, Rostron B, Cosgrove C, Altekruse SF, Hartman AM, Gibson JT, Apelberg B, Inoue-Choi M, Freedman ND: Association of Cigarette, Cigar, and Pipe Use With Mortality Risk in t he US Population. *JAMA Internal Medicine* 2018, 178(4):469.

9. Cote ML, Lehman A, Chlebowski R, Haynes B, Ho G, Patel M, Sakoda L, Simon M, Wakelee H, Schwartz A: Abstract 835: COPD and risk of lung cancer in post-menopausal women: f indings from the Women's Health Initiative. *Cancer Research* 2015, 75(15_Supplement):835-835.

10. Davis AL: Bronchogenic Carcinoma in Chronic Obstructive Pulmonary Disease. *JAMA: The Journal of the American Medical Association* 1976, 235(6):621.

11. Torres JP, Bastarrika G, Wisnivesky JP, Alcaide AB, Campo A, Seijo LM, Pueyo JC, Villanueva A, Lozano MD, Montes U *et al*: Assessing the Relationship Between Lung Cancer Risk and Emphysema Dete cted on Low-Dose CT of the Chest. *Chest* 2007, 132(6):1932-1938.

12. Torres JP, Marín JM, Casanova C, Cote C, Carrizo S, Cordoba-Lanus E, Baz-Dávila R, Zulueta JJ, Aguirre-Jaime A, Saetta M *et al*: Lung Cancer in Patients with Chronic Obstructive Pulmonary Disease: In cidence and Predicting Factors. *American Journal of Respiratory and Critical Care Medicine* 2011, 184(8):913-919.

13. Divo M, Cote C, Pinto-Plata VM, De Torres JP, Casanova C, Marin JM, Zulueta J, Zagaceta J, Cabrera Lopez C, Celli BR: Comorbidities, Gender And Mortality Differences In Patients With COPD. In*: 2012/5//*: American Thoracic Society: A3895-A3895.

14. Dorn HF: Tobacco consumption and mortality from cancer and other diseases. *Public Health Reports (Washington, DC: 1896)* 1959, 74(7):581-593.

15. Henderson L, Marsh MW, Pritchard MA, Benefield TS, Molina PL, Rivera MP: Lung Cancer Risk and Characteristics of Adults Undergoing LDCT Lung Ca ncer Screening. *American Thoracic Society* 2018.

16. Henley SJ, Thun MJ, Chao A, Calle EE: Association between exclusive pipe smoking and mortality from cancer a nd other diseases. *JNCI Journal of the National Cancer Institute* 2004, 96(11):853-861.

17. Henley SJ, Connell CJ, Richter P, Husten C, Pechacek T, Calle EE, Thun MJ: Tobacco-related disease mortality among men who switched from cigarett es to spit tobacco. *Tobacco Control* 2007, 16(1):22-28.

18. Huang R, Wei Y, Hung RJ, Liu G, Su L, Zhang R, Zong X, Zhang Z-F, Morgenstern H, Brüske I *et al*: Associated Links Among Smoking, Chronic Obstructive Pulmonary Disease, and Small Cell Lung Cancer: A Pooled Analysis in the International Lu ng Cancer Consortium. *EBioMedicine* 2015, 2(11):1677-1685.

19. Hung RJ: MS12.04 The International Lung Cancer Consortium (ILCCO), an Internati onal Study to Identify Risk Factors for Lung Cancer Development. *Journal of Thoracic Oncology* 2019, 14(10):S180.

20. Islam SS, Schottenfeld D: Declining FEV1 and chronic productive cough in cigarette smokers: a 25 -year prospective study of lung cancer incidence in Tecumseh, Michigan. *Cancer Epidemiology, Biomarkers & Prevention: A Publication of the Ame rican Association for Cancer Research, Cosponsored by the American Soc iety of Preventive Oncology* 1994, 3(4):289-298.

21. Kahn HA: The Dorn study of smoking and mortality among U.S. veterans: report on eight and one-half years of observation. *National Cancer Institute Monograph* 1966, 19:1-125.

22. Kinsey CM, Washko GR, Christiani DC: Association Of Lung Adenocarcinoma And Radiographic Emphysema. In*: 2012/5//*: American Thoracic Society: A4404-A4404.

23. Labaki WW, Gu T, Murray S, Curtis JL, Soler X, Bhatt SP, Bon JM, Beaty T, Hokanson JE, Curran-Everett D *et al*: Causes and Predictors of Death in Smokers with and Without COPD: An An alysis of the COPDGene Cohort. In*: 2019/5//*: American Thoracic Society: A3995-A3995.

24. Lewis DR, Clegg LX, Johnson NJ: Lung Disease Mortality in the United States: The National Longitudinal Mortality Study. *The International Journal of Tuberculosis and Lung Disease: The Offici al Journal of the International Union Against Tuberculosis and Lung Di sease* 2009, 13(8):1008-1014.

25. Loganathan RS, Stover DE, Shi W, Venkatraman E: Prevalence of COPD in women compared to men around the time of diagnos is of primary lung cancer. *Chest* 2006, 129(5):1305-1312.

26. Mukherjee V, Messina J, Tsay J-C, Munger J, Rom W: Significance of Emphysema in a Lung Cancer Screening Cohort. *Chest* 2015, 148(4):698A.

27. Ostridge KK, Kim KK, Williams N, Barton A, Harden S, Aris E, Peeters M, Devaster J-M, Bourne S, Wilkinson T: Incidental Lung Cancer and Pulmonary Nodules Identified by Research CT in a Population with Moderate to Very Severe COPD. *American Thoracic Society* 2015.

28. Patel B, Priefer R: Impact of chronic obstructive pulmonary disease, lung infection, and/o r inhaled corticosteroids use on potential risk of lung cancer. *Life Sciences* 2022, 294:120374.

29. Regan EA, Bowler RP, Wilson C, Hokanson JE, Crapo J: Longitudinal Data Collection Identifies Incidence Of New Patient-Repor ted Comorbidities In Smokers With And Without COPD. *American Thoracic Society* 2013.

30. Safi F, Lu M, Levin AM, Massion PP, Midthun DE, Nana-Sinkam P, Arenberg DA, Musani AI, Mazzone PJ, Nathan S *et al*: Demographic Characteristics Of Subjects Recruited For Lung Cancer And COPD Risk Test Validation. *American Thoracic Society* 2013.

31. Sanchez Salcedo P, Sanchez-Carpintero M, Bertó J, Rivera P, Alcaide AB, Torres JP, Campo A, Zagaceta J, Zulueta J: Emphysema, COPD and lung cancer screening. Update of an ongoing study. *European Respiratory Journal* 2012, 40(Suppl 56):P4186.

32. Samet JM, Key CR, Kutvirt DM, Wiggins CL: Respiratory disease mortality in New Mexico's American Indians and His panics. *American Journal of Public Health* 1980, 70(5):492-497.

33. Semenzato U, Biondini D, Bazzan E, Tiné M, Balestro E, Buldini B, Carizzo SJ, Cubero P, Marin-Oto M, Casara A *et al*: Low-Blood Lymphocyte Number and Lymphocyte Decline as Key Factors in C OPD Outcomes: A Longitudinal Cohort Study. *Respiration; International Review of Thoracic Diseases* 2021, 100(7):618-630.

34. Singh S, Steiling K, Burks E, Moreira P, Cabral H, Buck A, Litle V, Suzuki K: REAPPRAISAL OF RISK FACTORS FOR LUNGRADS 4 IN A RACIALLY DIVERSE SCREE NING COHORT. *Chest* 2020, 157(6, Supplement):A241.

35. Skillrud DM, Offord KP, Miller RD: Higher risk of lung cancer in chronic obstructive pulmonary disease. A prospective, matched, controlled study. *Annals of Internal Medicine* 1986, 105(4):503-507.

36. Thun MJ, Carter BD, Feskanich D, Freedman ND, Prentice R, Lopez AD, Hartge P, Gapstur SM: 50-Year Trends in Smoking-Related Mortality in the United States. *NEW ENGLAND JOURNAL OF MEDICINE* 2013, 368(4):351-364.

37. Tofolean D, Mazilu L, Adam T, Suceveanu A-I, Iorga P, Tofolean I-T: COPD prevalence in lung cancer patients – Is COPD a risk factor for lu ng cancer? *European Respiratory Journal* 2011, 38(Suppl 55):p2729.

38. Virdi RPS, Fisher JM, Balekian AA: Passive Smoke Exposure is not a Significant Risk Factor in the Develop ment of Lung Cancer. *Annals of Oncology* 2015, 26:i6.
